# Supplementary material
Source: PubMed Central journal article supplement (PMC4913514)
Supplement: NIHMS793183-supplement.pdf [file NIHMS793183-supplement.pdf]

## Supplemental Information

**Table S1. Peptides, transitions, and instrument parameters for GDF11 and MSTN.** Related to Figure 1.

| Peptide        | Parent Mass<br>m/z Da | Product Mass                                                   |
|----------------|-----------------------|----------------------------------------------------------------|
| <b>GDF11</b>   |                       |                                                                |
| NLGLDCDEHSSSR  | 809.8454              | 969.2779, 1391.5444                                            |
| YPHTHLVQQANPR  | 520.9392              | 713.3695, 812.4346, 925.5221, 1062.5815, 1163.6301             |
| QQIYGK         | 425.2451              | 480.2812, 593.3657, 704.3951                                   |
| IPGMVVDR       | 443.7453              | 619.3232, 676.3447, 773.3978                                   |
| <b>MSTN</b>    |                       |                                                                |
| DFGLDCDEHSTESR | 556.5610              | 703.2864, 1405.5664                                            |
| ANYCSGECEFLQK  | 926.4057              | 634.3929, 781.4597, 1070.5354, 1256.6011, 1343.6337, 1503.6647 |
| YPHTHLVHQANPR  | 523.9399              | 722.3685, 821.4362, 934.5202, 1071.5791, 1172.6278, 1309.6855  |
| EQIYGK         | 425.7377              | 480.2812, 593.3657, 704.3951                                   |
| IPAMVVDR       | 443.7453              | 394.2099, 787.4123                                             |

**Table S2. Inter-assay precision of GDF11 quantification.** Six replicate measures of recombinant GDF11 at four concentrations diluted in 5% bovine serum albumin in phosphate buffered saline and pooled human serum sample were analyzed. Related to Figure 1.

| <b>GDF11 Peptide</b>      | <b>IPGMVVDR</b> | <b>YPHTHLVQQANPR</b> |
|---------------------------|-----------------|----------------------|
| <b>0.777ng/ml</b>         |                 |                      |
| Mean                      | 0.826           | 0.897                |
| SD                        | 0.087           | 0.113                |
| CV                        | 10.5            | 12.6                 |
| <b>2.33ng/ml</b>          |                 |                      |
| Mean                      | 2.36            | 2.35                 |
| SD                        | 0.331           | 0.333                |
| CV                        | 14.0            | 14.1                 |
| <b>4.67ng/ml</b>          |                 |                      |
| Mean                      | 4.59            | 4.82                 |
| SD                        | 0.670           | 0.540                |
| CV                        | 14.6            | 11.2                 |
| <b>9.33ng/ml</b>          |                 |                      |
| Mean                      | 8.42            | 9.42                 |
| SD                        | 1.30            | 1.73                 |
| CV                        | 15.5            | 18.4                 |
| <b>Pooled Human Serum</b> |                 |                      |
| Mean                      | 0.680           | 0.699                |
| SD                        | 0.080           | 0.067                |
| CV                        | 11.7            | 9.56                 |

**Table S3. Intra-assay precision of GDF11 quantification.** Five replicate measures of recombinant GDF11 at three concentrations diluted in 5% bovine serum albumin in phosphate buffered saline and pooled human serum sample were analyzed. Related to Figure 1.

| <b>GDF11 Peptide</b>      | <b>IPGMVVDR</b> |
|---------------------------|-----------------|
| <b>0.777ng/ml</b>         |                 |
| Mean                      | 0.836           |
| SD                        | 0.022           |
| CV                        | 2.69            |
| <b>4.67ng/ml</b>          |                 |
| Mean                      | 4.951           |
| SD                        | 0.073           |
| CV                        | 1.47            |
| <b>9.33ng/ml</b>          |                 |
| Mean                      | 10.2            |
| SD                        | 0.889           |
| CV                        | 8.69            |
| <b>Pooled Human Serum</b> |                 |
| Mean                      | 0.512           |
| SD                        | 0.054           |
| CV                        | 10.6            |

**Table S4. Percent recovery of GDF11.** A human serum pool was spiked at four increasing concentrations and the recovery was determined relative to the calculated value of the endogenous level plus the spike in concentration. Data was obtained from the YPHTHLVQQANPR peptide sequence. Related to Figure 1.

| <b>Spike Concentration (ng/ml)</b> | <b>Measured Concentration (ng/ml)</b> | <b>%Recovery</b> |
|------------------------------------|---------------------------------------|------------------|
| Neat Serum                         | 0.522                                 | -                |
| 0.777                              | 1.02                                  | 64.0%            |
| 1.55                               | 1.87                                  | 86.4%            |
| 3.11                               | 2.96                                  | 78.8%            |
| 6.22                               | 6.17                                  | 90.8%            |
| 12.4                               | 9.55                                  | 72.6%            |

**Table S5. Comparison of cardiac parameters to GDF11 levels. Related to Table 1.**

|                                    | GDF11 Level             |                         |                         |                    |
|------------------------------------|-------------------------|-------------------------|-------------------------|--------------------|
|                                    | 220-400 pg/ml<br>(n=35) | 401-500 pg/ml<br>(n=33) | 501-841 ng/ml<br>(n=28) |                    |
| <b>Cardiac parameter</b>           | <b>Mean (±SD)</b>       |                         |                         | <b>p-value</b>     |
| <b>Ejection fraction</b>           | 57.9 (13.3)             | 59.1 (12.9)             | 57.3 (12.0)             | 0.845 <sup>†</sup> |
| <b>Mean gradient</b>               | 51.0 (11.6)             | 47.5 (11.0)             | 48.6 (9.8)              | 0.394 <sup>†</sup> |
| <b>Aortic valve velocity</b>       | 4.5 (0.5)               | 4.4 (0.5)               | 4.4 (0.4)               | 0.765 <sup>†</sup> |
| <b>Valve area</b>                  | 0.9 (0.2)               | 0.8 (0.2)               | 0.8 (0.2)               | 0.339 <sup>†</sup> |
| <b>Valve area index</b>            | 0.4 (0.1)               | 0.4 (0.1)               | 0.4 (0.1)               | 0.978 <sup>†</sup> |
| <b>Left ventricular mass index</b> | 129.0 (30.3)            | 114.2 (30.7)            | 124.6 (25.9)            | 0.110 <sup>†</sup> |

<sup>†</sup>ANOVA F-test

**Table S6. Association between GDF11 and frailty, rehospitalization, and multiple adverse events after adjusting for potential confounding variables. Related to Table 1.**

| <b>Variables</b>                      | <b>Odds Ratio</b> | <b>95% CI</b> | <b>p-value</b> |
|---------------------------------------|-------------------|---------------|----------------|
| <b>Frailty</b>                        |                   |               |                |
| <b>Age/10 yr</b>                      | 5.78              | 2.35 – 17.3   | <0.001         |
| <b>Sex – Female</b>                   | 4.79              | 1.29 – 21.5   | 0.026          |
| <b>Cardiac Com.</b>                   | 9.12              | 2.50 – 42.1   | 0.002          |
| <b>BMI/5 pts</b>                      | 1.64              | 0.95 – 3.1    | 0.092          |
| <b>GDF11</b>                          |                   |               | <b>0.003</b>   |
| <b>Rehospitalization</b>              |                   |               |                |
| <b>Atrial fibrillation or flutter</b> | 11.67             | 2.82 – 61.37  | 0.001          |
| <b>Stroke</b>                         | 26.20             | 2.53 – 416.5  | 0.010          |
| <b>Pulmonary Disease</b>              | 0.26              | 0.05 – 1.06   | 0.076          |
| <b>BMI/ 5pts</b>                      | 2.40              | 1.36 – 4.85   | 0.006          |
| <b>GDF11</b>                          |                   |               | <b>0.044</b>   |
| <b>Multiple Adverse Events</b>        |                   |               |                |
| <b>Diabetes</b>                       | 3.17              | 1.01 – 10.12  | 0.047          |
| <b>GDF11</b>                          |                   |               | <b>0.041</b>   |

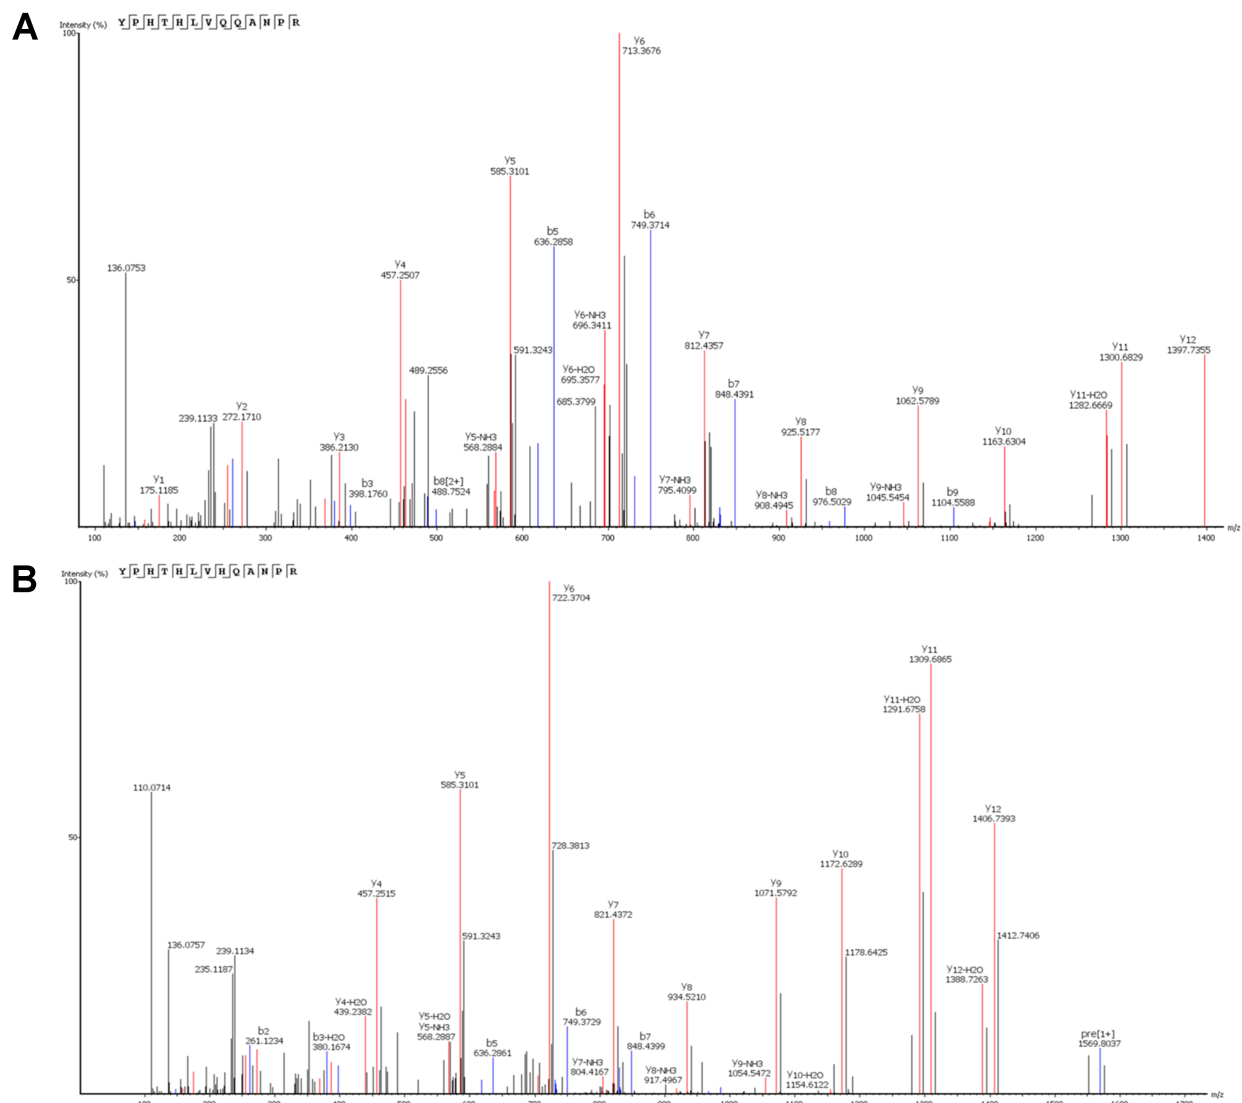

**Figure S1. Comparative MS/MS peptide spectra for GDF11 (A) and MSTN (B). Related to Figure 1.**
